# Supplementary material for: Effect of corneal stromal lenticule customization on neurite distribution and excitatory property
Source: PubMed Central journal article supplement — J Adv Res. 2021 Sep 16;38:275–84. doi: 10.1016/j.jare.2021.09.004 (PMC9091752; doi:10.1016/j.jare.2021.09.004), 2021-09-16
Supplement: mmc1.pdf [file mmc1.pdf]

# Effect of corneal stromal lenticule customization on neurite distribution and excitatory property

## Supplementary Materials

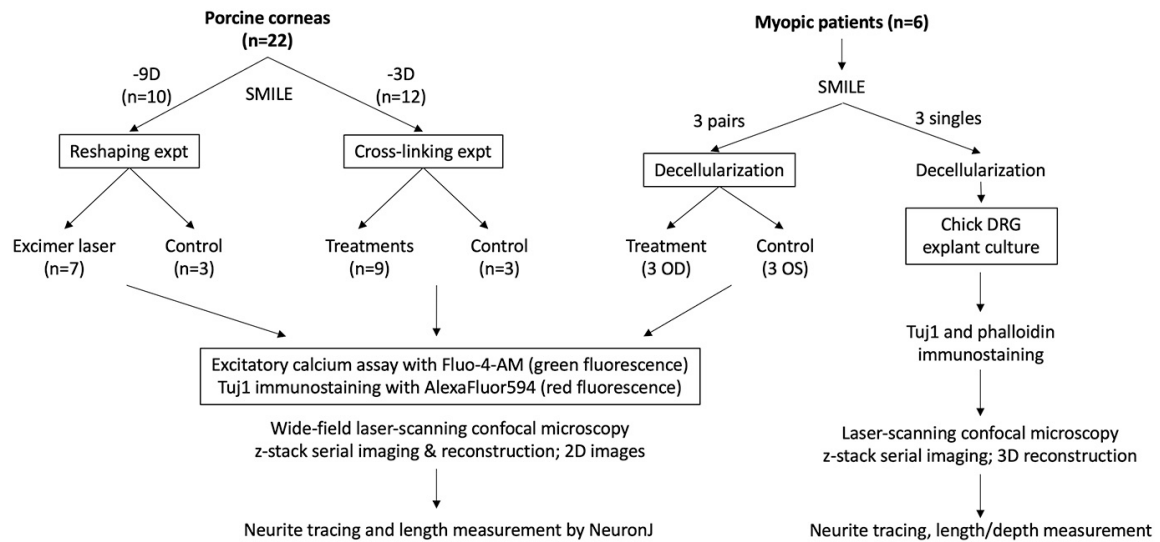

**Supplementary Fig 1.** A schematic showing the work flow from lenticule collection, customization, TuJ1 immunostaining and calcium assay, to the pan-lenticule imaging of neurites and quantification. Additional lenticules after decellularization were used for DRG innervation study. The numbers of lenticules used in each assay were indicated.

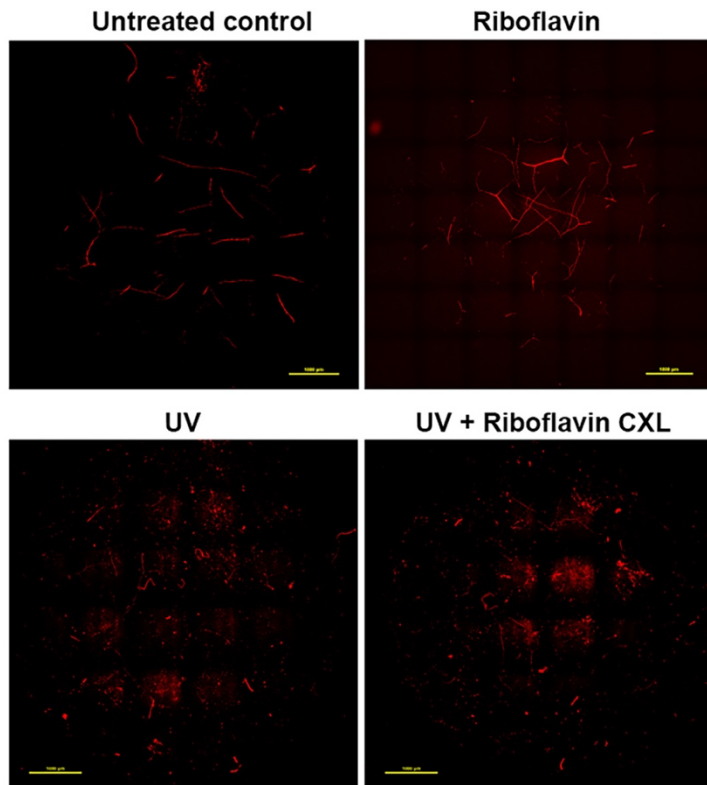

**Supplementary Fig 2.** Stromal neurite distribution of porcine lenticules after treatment with riboflavin only, UV-irradiation only, or UA-riboflavin crosslinking (CXL), compared to untreated control. The neurites were stained for TuJ1 (red fluorescence). Scale bars: 1 mm.

| <b>Neurites</b> | <b>Length of penetration</b> | <b>Neurites</b> | <b>Depth of penetration</b> |
|-----------------|------------------------------|-----------------|-----------------------------|
| 1               | 152                          | 1               | 10                          |
| 2               | 205                          | 2               | 39                          |
| 3               | 137                          | 3               | 16                          |
| 4               | 210                          | 4               | 53                          |
| 5               | 201                          | 5               | 50                          |
| 6               | 168                          | 6               | 14                          |
| 7               | 199                          | 7               | 18                          |
| 8               | 267                          | 8               | 34                          |
| 9               | 143                          | 9               | 42                          |
| 10              | 203                          |                 |                             |
| 11              | 222                          | Mean depth      | 30.67                       |
| 12              | 208                          | SD              | 16.44                       |
| 13              | 187                          |                 |                             |
| Mean length     | 192.46                       |                 |                             |
| SD              | 35.53                        |                 |                             |

**Supplementary Table 1.** Parameters of chick DRG neurite penetration (length and depth) in the decellularized human lenticules after 5-day culture.
